# Supplementary material
Source: PubMed Central journal article supplement (PMC3160026)

## Supplemental movie 1

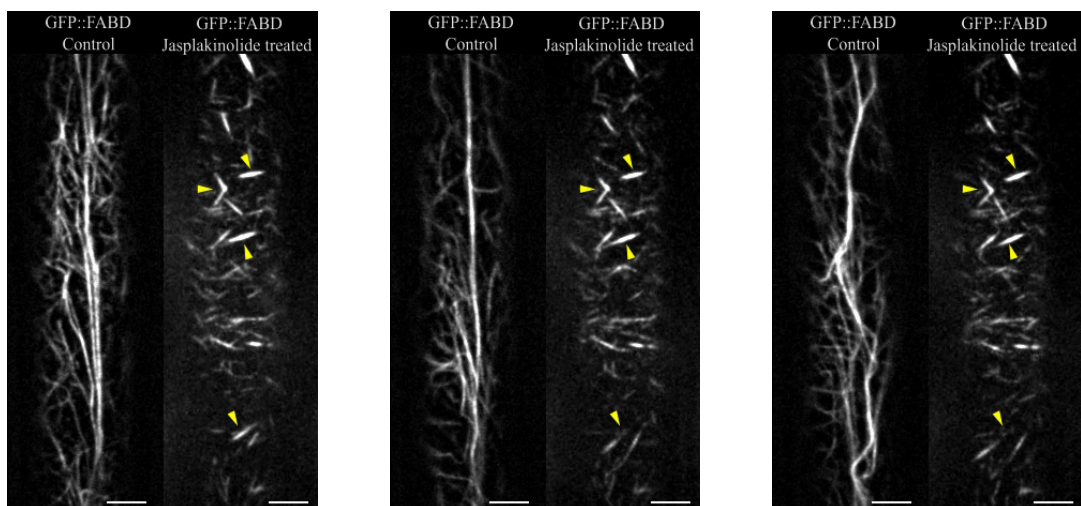

## Supplemental movie 2

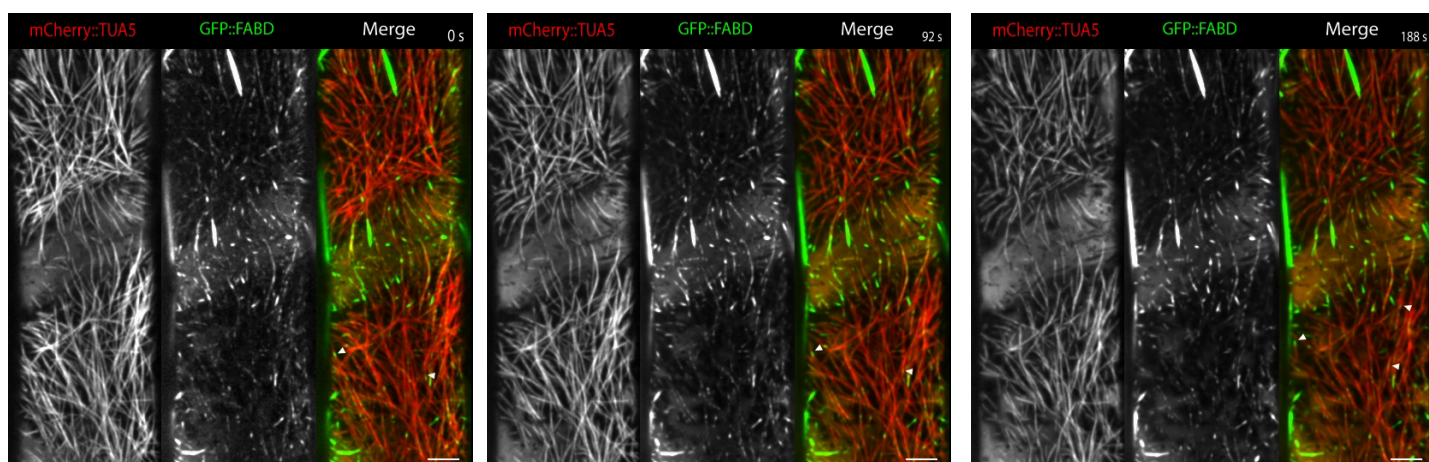

## Supplemental movie 3

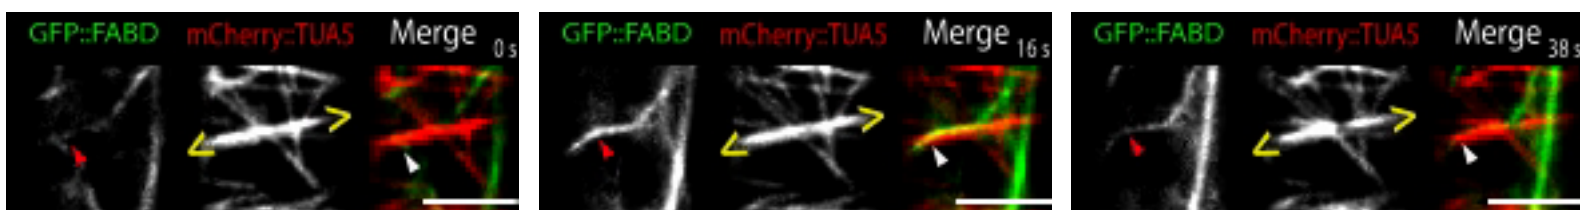

## Supplemental movie 4

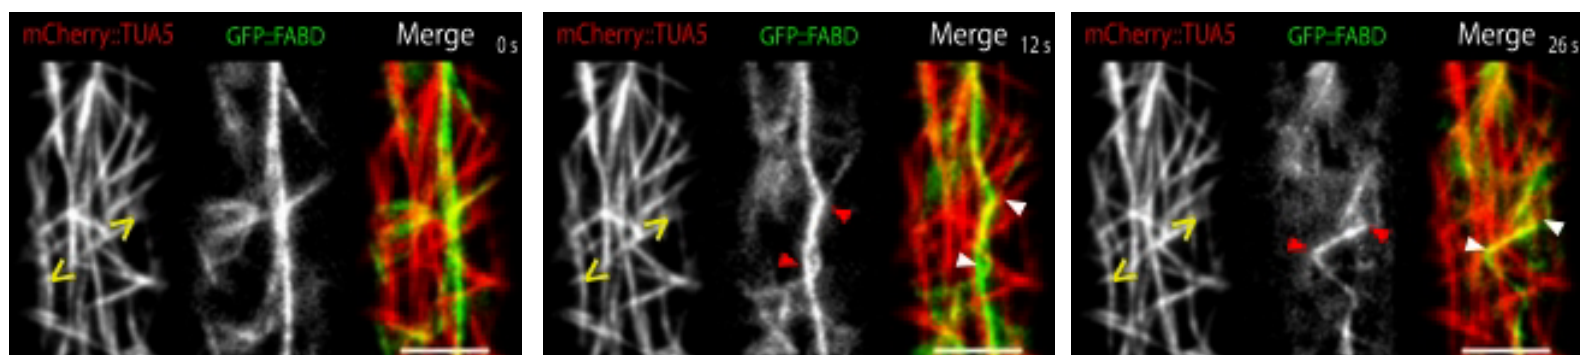

Supplemental movie 5

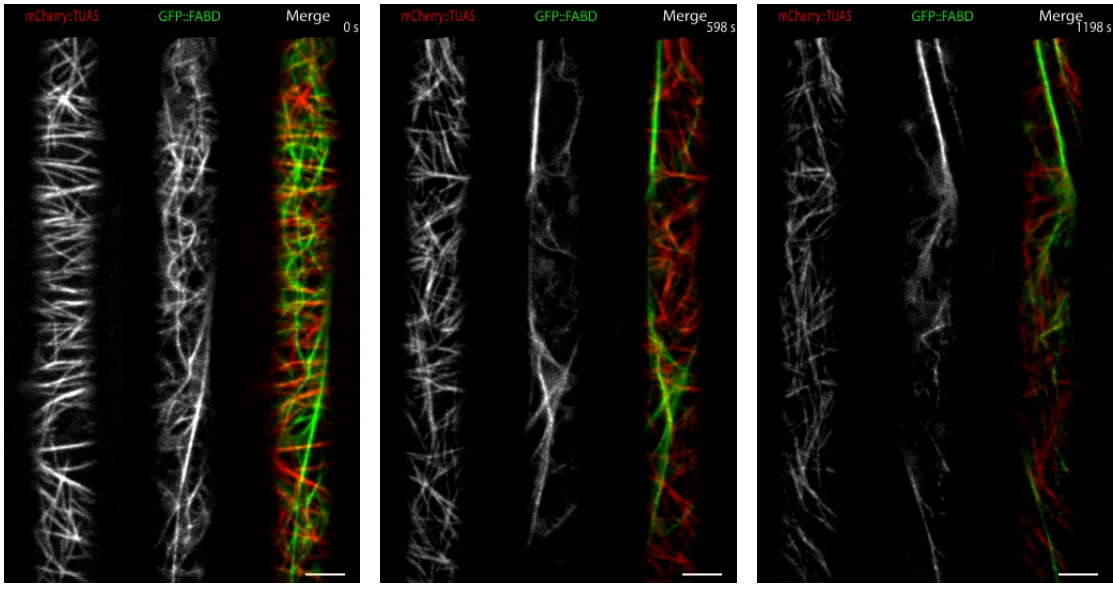

Supplemental movie 6

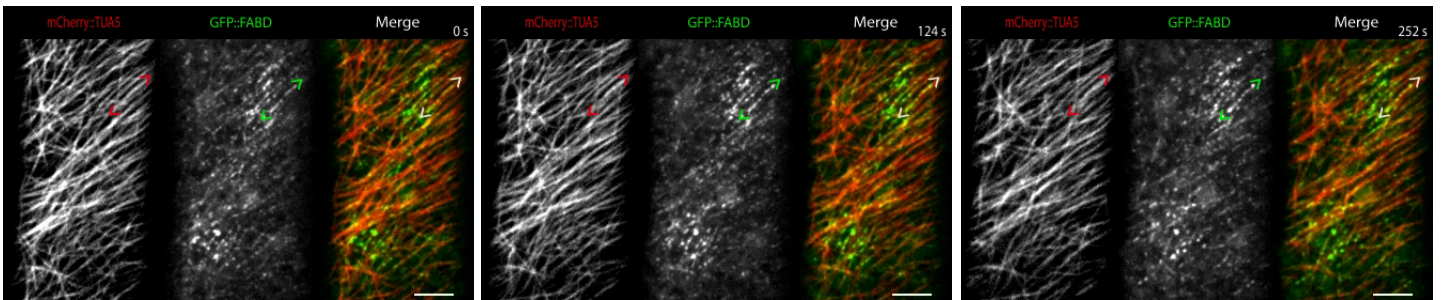

Supplemental movie 7

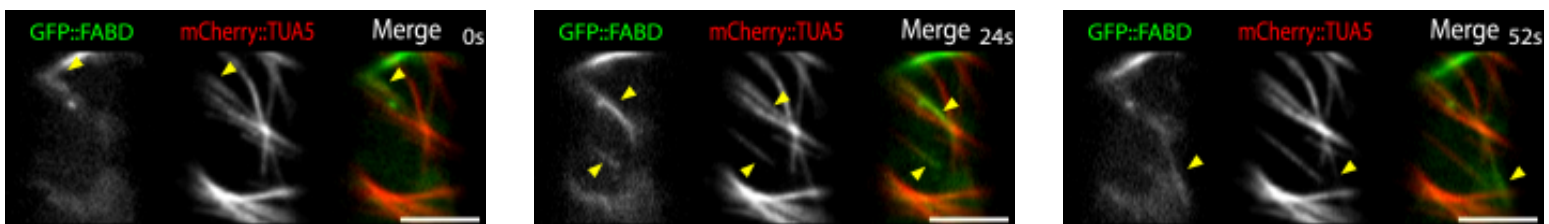

Supplemental movie 8

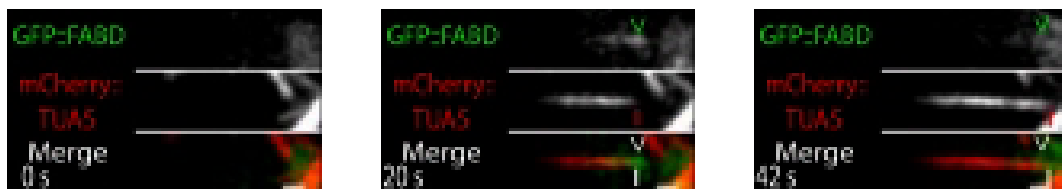



Supplemental movie 9

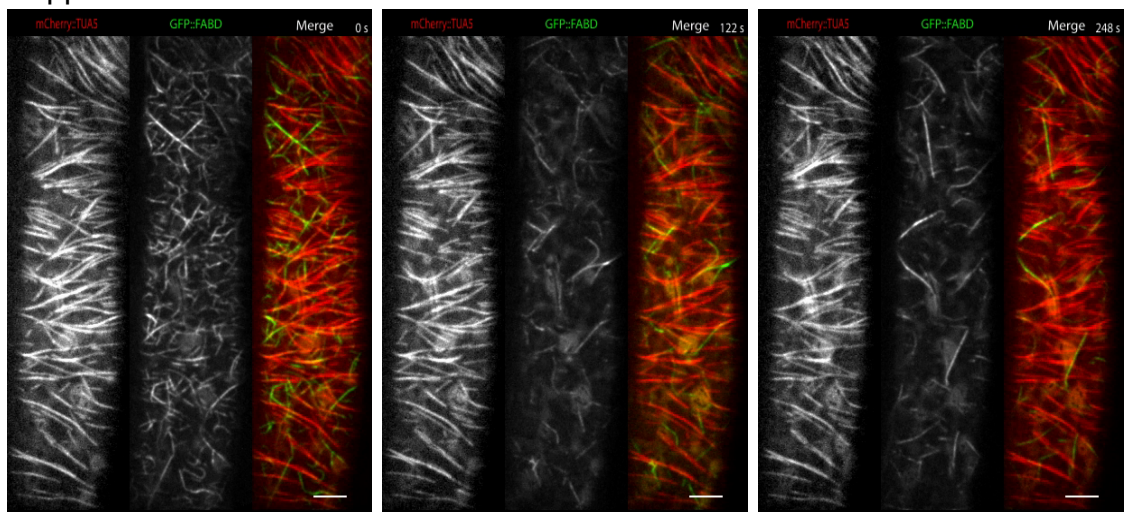

Supplemental movie 10

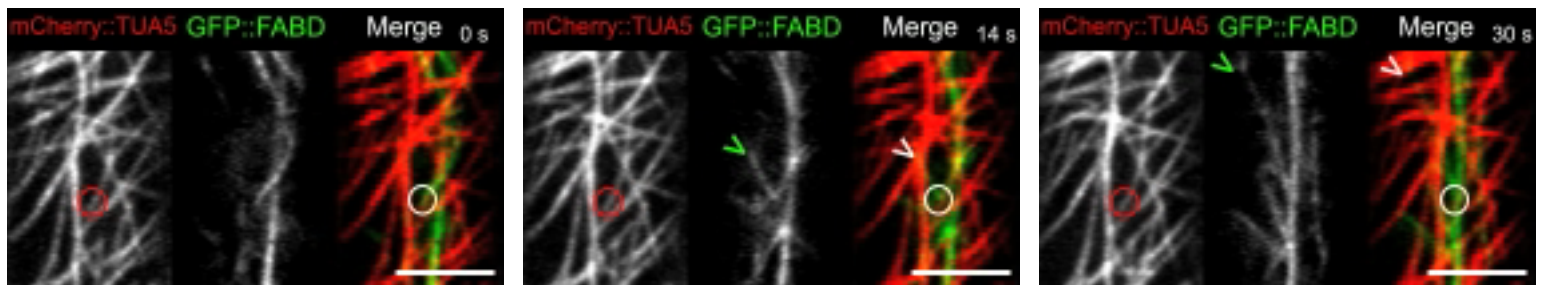

Supplemental movie 11

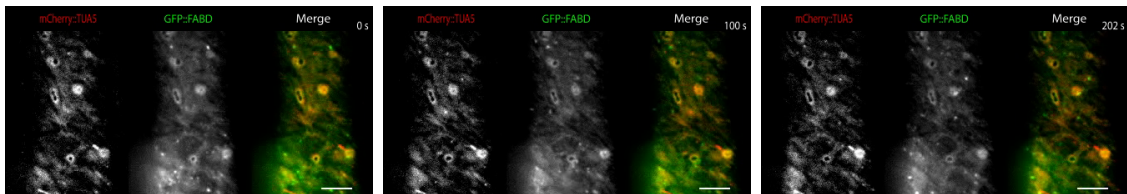

Supplemental movie 12

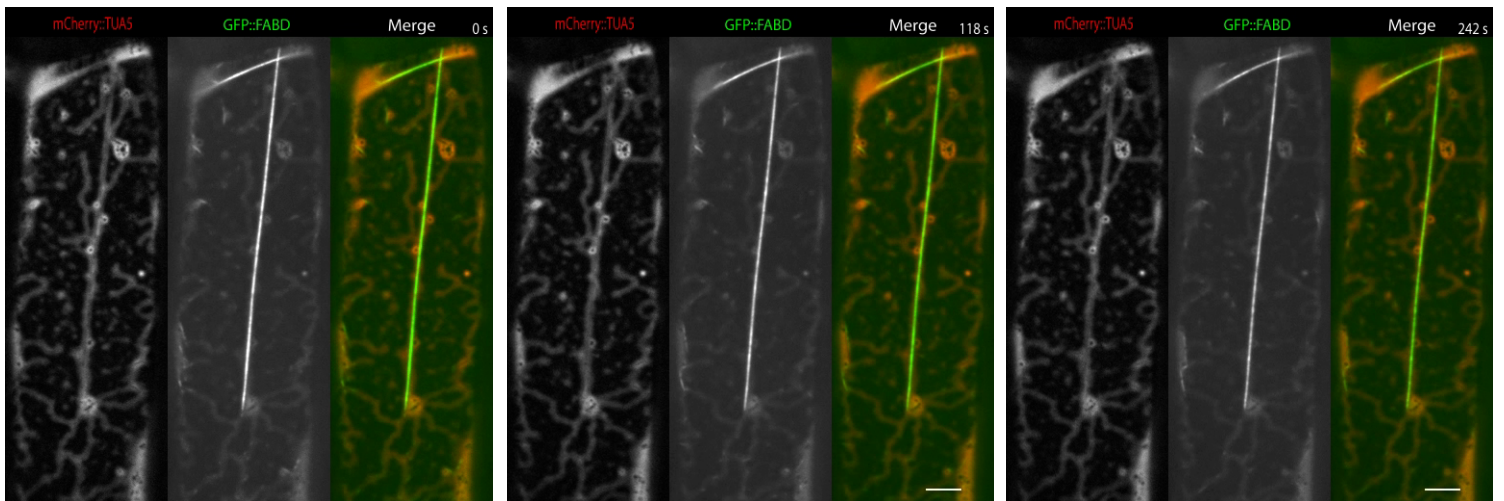

Supplemental movie 13

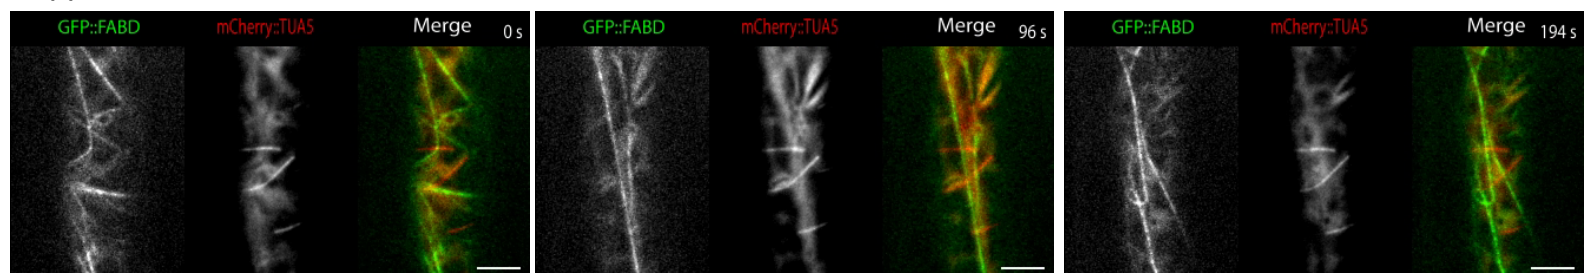



Supplemental movie 14

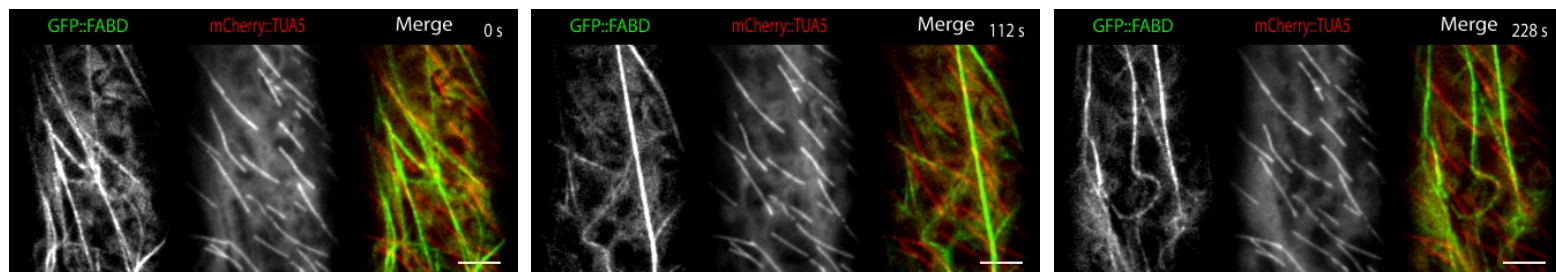

Supplemental movie 15

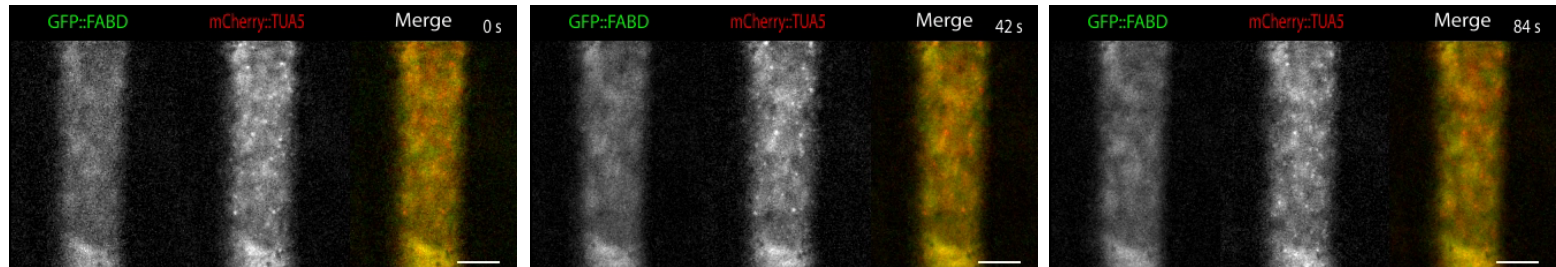

Supplemental movie 16

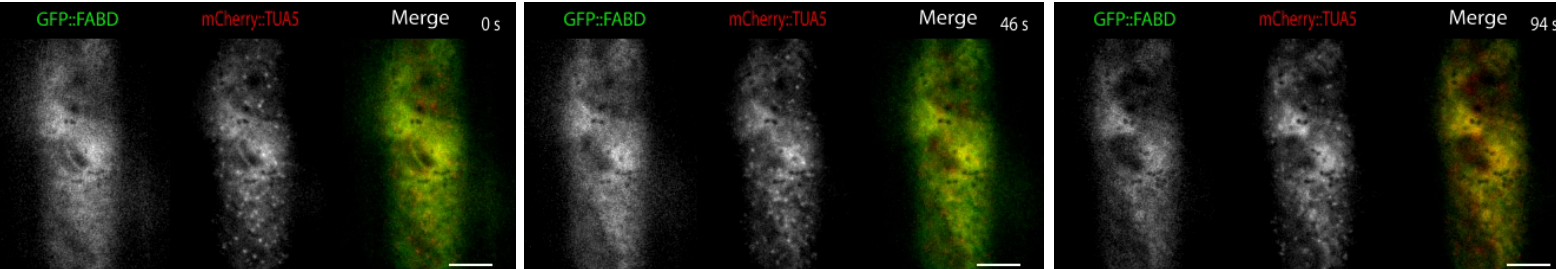

Supplemental movie 17

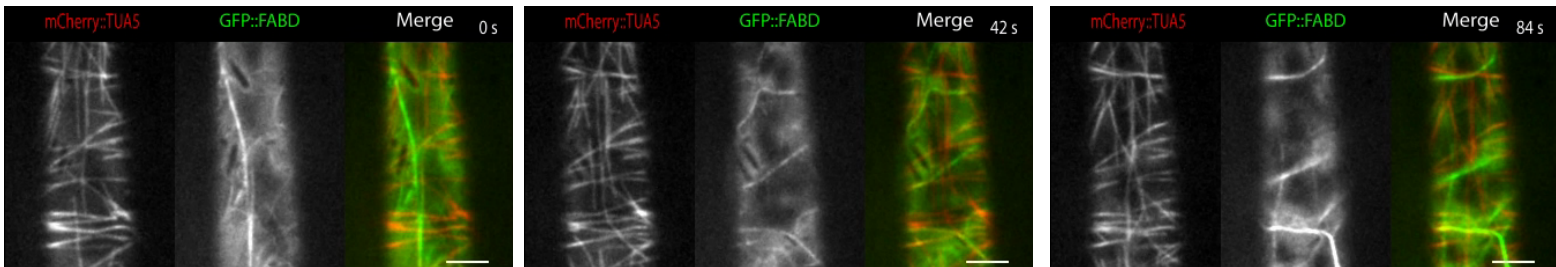

Supplemental movie 18

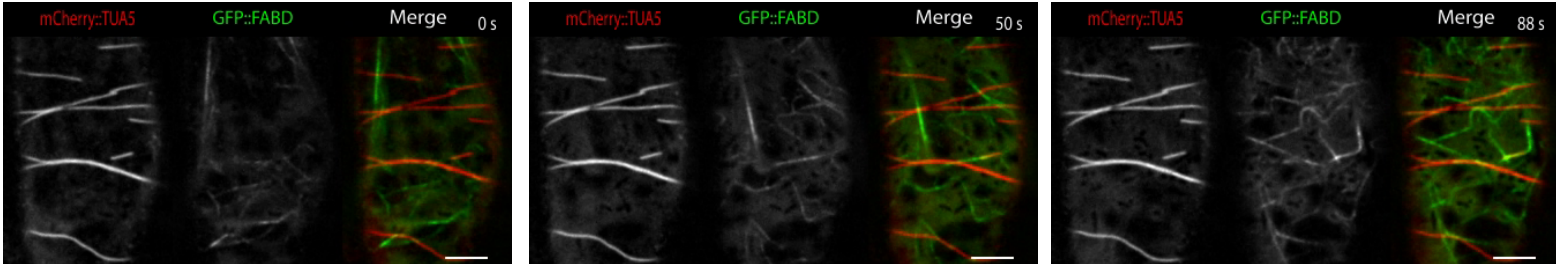

Supplemental movie 19

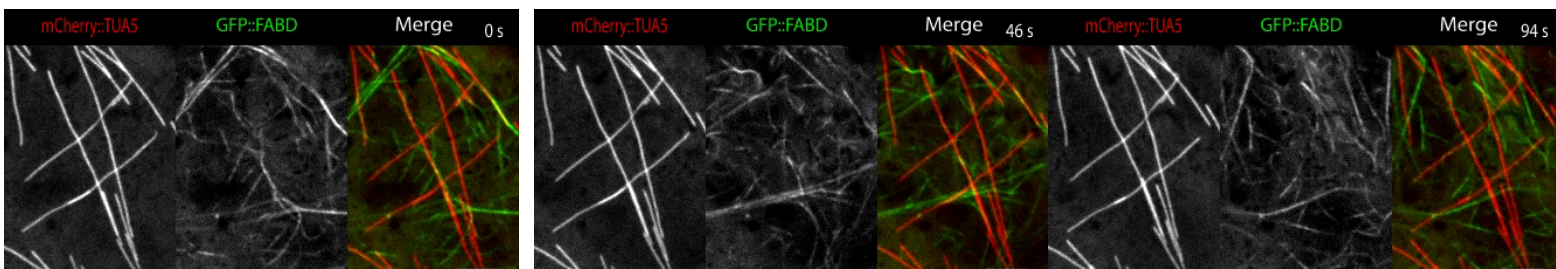

Supplement: supp_tpc.111.087940_Supplemental_movie_figures.pdf [file supp_tpc.111.087940_Supplemental_movie_figures.pdf]
